# Supplementary material for: Controlled aggregation enhances immunomodulatory potential of mesenchymal stromal cell aggregates
Source: PubMed Central journal article supplement — Stem Cells Transl Med. 2021 Apr 5;10(8):1184–201. doi: 10.1002/sctm.19-0414 (PMC8284773; doi:10.1002/sctm.19-0414), 2021-04-05
Supplement: SCT3-10-1184-s001.pdf [file SCT3-10-1184-s001.pdf]

## SUPPLEMENTAL INFORMATION

**Supplementary Table S1.** List of genes for RT2 Profiler qPCR Array – Human Mesenchymal Stem Cells.

| UniGene   | GenBank      | Gene Symbol | Description                                                                                                    |
|-----------|--------------|-------------|----------------------------------------------------------------------------------------------------------------|
| Hs.489033 | NM_000927    | ABCB1       | ATP-binding cassette, sub-family B (MDR/TAP), member 1                                                         |
| Hs.500483 | NM_001613    | ACTA2       | Actin, alpha 2, smooth muscle, aorta                                                                           |
| Hs.591293 | NM_001627    | ALCAM       | Activated leukocyte cell adhesion molecule                                                                     |
| Hs.1239   | NM_001150    | ANPEP       | Alanyl (membrane) aminopeptidase                                                                               |
| Hs.480653 | NM_001154    | ANXA5       | Annexin A5                                                                                                     |
| Hs.502182 | NM_001709    | BDNF        | Brain-derived neurotrophic factor                                                                              |
| Hs.654541 | NM_199173    | BGLAP       | Bone gamma-carboxyglutamate (gla) protein                                                                      |
| Hs.73853  | NM_001200    | BMP2        | Bone morphogenetic protein 2                                                                                   |
| Hs.68879  | NM_130851    | BMP4        | Bone morphogenetic protein 4                                                                                   |
| Hs.285671 | NM_001718    | BMP6        | Bone morphogenetic protein 6                                                                                   |
| Hs.473163 | NM_001719    | BMP7        | Bone morphogenetic protein 7                                                                                   |
| Hs.141125 | NM_004346    | CASP3       | Caspase 3, apoptosis-related cysteine peptidase                                                                |
| Hs.502328 | NM_000610    | CD44        | CD44 molecule (Indian blood group)                                                                             |
| Hs.172928 | NM_000088    | COL1A1      | Collagen, type I, alpha 1                                                                                      |
| Hs.1349   | NM_000758    | CSF2        | Colony stimulating factor 2 (granulocyte-macrophage)                                                           |
| Hs.2233   | NM_000759    | CSF3        | Colony stimulating factor 3 (granulocyte)                                                                      |
| Hs.476018 | NM_001904    | CTNNB1      | Catenin (cadherin-associated protein), beta 1, 88kDa                                                           |
| Hs.419815 | NM_001963    | EGF         | Epidermal growth factor                                                                                        |
| Hs.76753  | NM_000118    | ENG         | Endoglin                                                                                                       |
| Hs.446352 | NM_004448    | ERBB2       | V-erb-b2 erythroblastic leukemia viral oncogene homolog 2, neuro/glioblastoma derived oncogene homolog (avian) |
| Hs.664499 | NM_004465    | FGF10       | Fibroblast growth factor 10                                                                                    |
| Hs.284244 | NM_002006    | FGF2        | Fibroblast growth factor 2 (basic)                                                                             |
| Hs.69747  | NM_000148    | FUT1        | Fucosyltransferase 1 (galactoside 2-alpha-L-fucosyltransferase, H blood group)                                 |
| Hs.390420 | NM_002033    | FUT4        | Fucosyltransferase 4 (alpha (1,3) fucosyltransferase, myeloid-specific)                                        |
| Hs.647029 | NM_003508    | FZD9        | Frizzled family receptor 9                                                                                     |
| Hs.616962 | NM_004864    | GDF15       | Growth differentiation factor 15                                                                               |
| Hs.1573   | NM_000557    | GDF5        | Growth differentiation factor 5                                                                                |
| Hs.492277 | NM_001001557 | GDF6        | Growth differentiation factor 6                                                                                |
| Hs.447688 | NM_182828    | GDF7        | Growth differentiation factor 7                                                                                |

|           |           |        |                                                                                              |
|-----------|-----------|--------|----------------------------------------------------------------------------------------------|
| Hs.445977 | NM_002097 | GTF3A  | General transcription factor IIIA                                                            |
| Hs.632532 | NM_003642 | HAT1   | Histone acetyltransferase 1                                                                  |
| Hs.88556  | NM_004964 | HDAC1  | Histone deacetylase 1                                                                        |
| Hs.396530 | NM_000601 | HGF    | Hepatocyte growth factor (hepapoietin A; scatter factor)                                     |
| Hs.654455 | NM_000545 | HNF1A  | HNF1 homeobox A                                                                              |
| Hs.643447 | NM_000201 | ICAM1  | Intercellular adhesion molecule 1                                                            |
| Hs.856    | NM_000619 | IFNG   | Interferon, gamma                                                                            |
| Hs.160562 | NM_000618 | IGF1   | Insulin-like growth factor 1 (somatomedin C)                                                 |
| Hs.193717 | NM_000572 | IL10   | Interleukin 10                                                                               |
| Hs.126256 | NM_000576 | IL1B   | Interleukin 1, beta                                                                          |
| Hs.654458 | NM_000600 | IL6    | Interleukin 6 (interferon, beta 2)                                                           |
| Hs.654579 | NM_000207 | INS    | Insulin                                                                                      |
| Hs.133397 | NM_000210 | ITGA6  | Integrin, alpha 6                                                                            |
| Hs.436873 | NM_002210 | ITGAV  | Integrin, alpha V (vitronectin receptor, alpha polypeptide, antigen CD51)                    |
| Hs.248472 | NM_000887 | ITGAX  | Integrin, alpha X (complement component 3 receptor 4 subunit)                                |
| Hs.643813 | NM_002211 | ITGB1  | Integrin, beta 1 (fibronectin receptor, beta polypeptide, antigen CD29 includes MDF2, MSK12) |
| Hs.728907 | NM_000214 | JAG1   | Jagged 1                                                                                     |
| Hs.533055 | NM_003884 | KAT2B  | K(lysine) acetyltransferase 2B                                                               |
| Hs.479756 | NM_002253 | KDR    | Kinase insert domain receptor (a type III receptor tyrosine kinase)                          |
| Hs.1048   | NM_003994 | KITLG  | KIT ligand                                                                                   |
| Hs.2250   | NM_002309 | LIF    | Leukemia inhibitory factor (cholinergic differentiation factor)                              |
| Hs.599039 | NM_006500 | MCAM   | Melanoma cell adhesion molecule                                                              |
| Hs.513617 | NM_004530 | MMP2   | Matrix metalloproteinase 2 (gelatinase A, 72kDa gelatinase, 72kDa type IV collagenase)       |
| Hs.527971 | NM_006617 | NES    | Nestin                                                                                       |
| Hs.415768 | NM_002507 | NGFR   | Nerve growth factor receptor                                                                 |
| Hs.495473 | NM_017617 | NOTCH1 | Notch 1                                                                                      |
| Hs.153952 | NM_002526 | NT5E   | 5'-nucleotidase, ecto (CD73)                                                                 |
| Hs.558459 | NM_007083 | NUDT6  | Nudix (nucleoside diphosphate linked moiety X)-type motif 6                                  |
| Hs.509067 | NM_002609 | PDGFRB | Platelet-derived growth factor receptor, beta polypeptide                                    |
| Hs.462550 | NM_033198 | PIGS   | Phosphatidylinositol glycan anchor biosynthesis, class S                                     |
| Hs.249184 | NM_002701 | POU5F1 | POU class 5 homeobox 1                                                                       |
| Hs.162646 | NM_015869 | PPARG  | Peroxisome proliferator-activated receptor gamma                                             |

|           |           |         |                                                              |
|-----------|-----------|---------|--------------------------------------------------------------|
| Hs.614734 | NM_006017 | PROM1   | Prominin 1                                                   |
| Hs.395482 | NM_005607 | PTK2    | PTK2 protein tyrosine kinase 2                               |
| Hs.654514 | NM_002838 | PTPRC   | Protein tyrosine phosphatase, receptor type, C               |
| Hs.247077 | NM_001664 | RHOA    | Ras homolog gene family, member A                            |
| Hs.535845 | NM_004348 | RUNX2   | Runt-related transcription factor 2                          |
| Hs.597422 | NM_012434 | SLC17A5 | Solute carrier family 17 (anion/sugar transporter), member 5 |
| Hs.75862  | NM_005359 | SMAD4   | SMAD family member 4                                         |
| Hs.189329 | NM_020429 | SMURF1  | SMAD specific E3 ubiquitin protein ligase 1                  |
| Hs.705442 | NM_022739 | SMURF2  | SMAD specific E3 ubiquitin protein ligase 2                  |
| Hs.518438 | NM_003106 | SOX2    | SRY (sex determining region Y)-box 2                         |
| Hs.647409 | NM_000346 | SOX9    | SRY (sex determining region Y)-box 9                         |
| Hs.381715 | NM_181486 | TBX5    | T-box 5                                                      |
| Hs.492203 | NM_198253 | TERT    | Telomerase reverse transcriptase                             |
| Hs.645227 | NM_000660 | TGFB1   | Transforming growth factor, beta 1                           |
| Hs.592317 | NM_003239 | TGFB3   | Transforming growth factor, beta 3                           |
| Hs.644697 | NM_006288 | THY1    | Thy-1 cell surface antigen                                   |
| Hs.241570 | NM_000594 | TNF     | Tumor necrosis factor                                        |
| Hs.109225 | NM_001078 | VCAM1   | Vascular cell adhesion molecule 1                            |
| Hs.73793  | NM_003376 | VEGFA   | Vascular endothelial growth factor A                         |
| Hs.642813 | NM_003380 | VIM     | Vimentin                                                     |
| Hs.440848 | NM_000552 | VWF     | Von Willebrand factor                                        |
| Hs.336930 | NM_033131 | WNT3A   | Wingless-type MMTV integration site family, member 3A        |
| Hs.335787 | NM_174900 | ZFP42   | Zinc finger protein 42 homolog (mouse)                       |
| Hs.520640 | NM_001101 | ACTB    | Actin, beta                                                  |
| Hs.534255 | NM_004048 | B2M     | Beta-2-microglobulin                                         |
| Hs.592355 | NM_002046 | GAPDH   | Glyceraldehyde-3-phosphate dehydrogenase                     |
| Hs.412707 | NM_000194 | HPRT1   | Hypoxanthine phosphoribosyltransferase 1                     |
| Hs.546285 | NM_001002 | RPLP0   | Ribosomal protein, large, P0                                 |

## SUPPLEMENTARY FIGURES

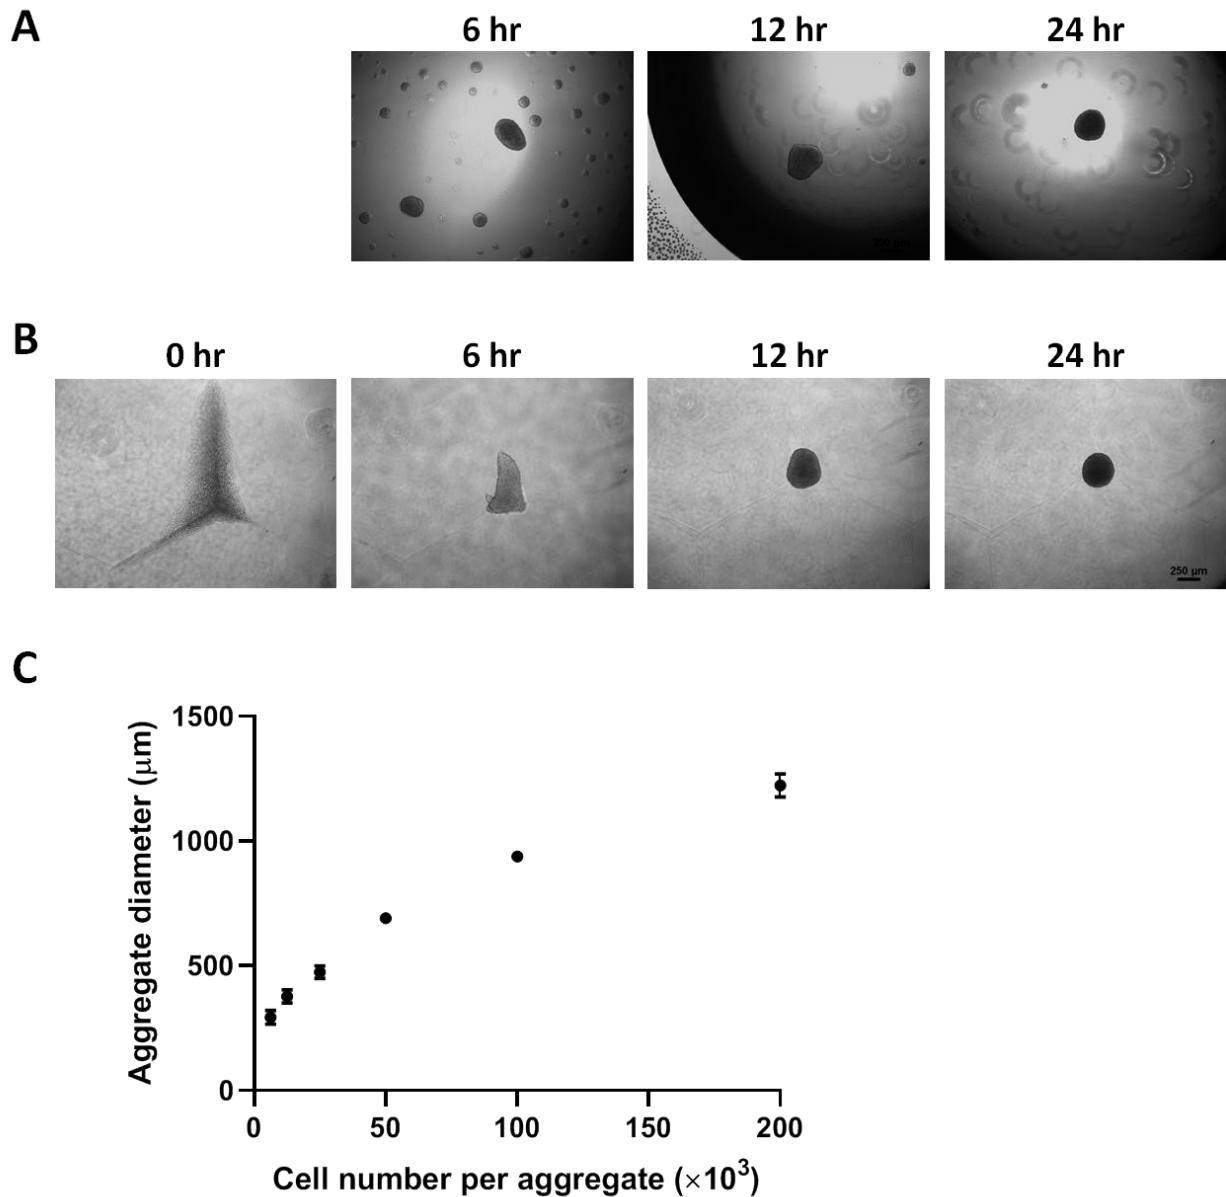

### Supplementary Fig. S1. Time course of MSC aggregation by conventional methods.

Brightfield images of MSCs in (A) HD and (B) FC formats from the time of seeding (0 hr) to 24 hr post-seed. Both methods generated three-dimensional structures by 6 hr post-seed, and formed compact aggregates by 24 hr. Compaction of HD and FC aggregates over time can be seen as changes in shape (oblong to spherical) and increased opacity from 6 hr to 24 hr.

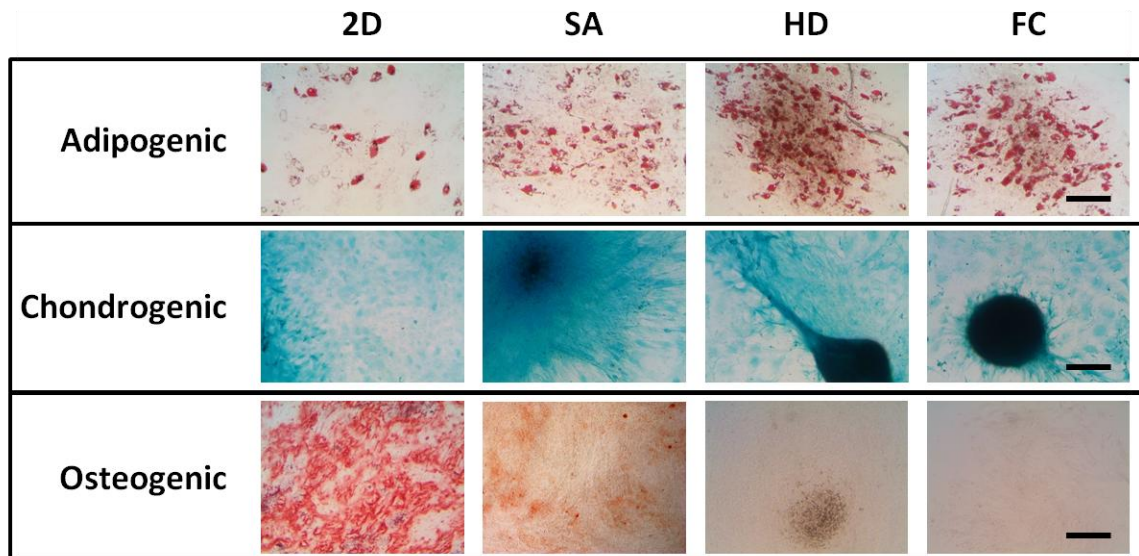

**Supplementary Fig. S2. Trilineage differentiation capacity of 2D monolayer and 3D aggregate MSCs.** 2D MSCs or 3D MSC aggregates (SA, HD, and FC) were plated on Collagen I-coated plates and maintained in (A) adipogenic, (B) chondrogenic, or (C) osteogenic differentiation media for 21 days before staining for Oil Red O, Alcian Blue, and Alizarin Red, respectively. Scale bars = 500  $\mu$ m.

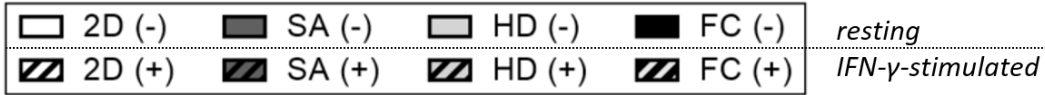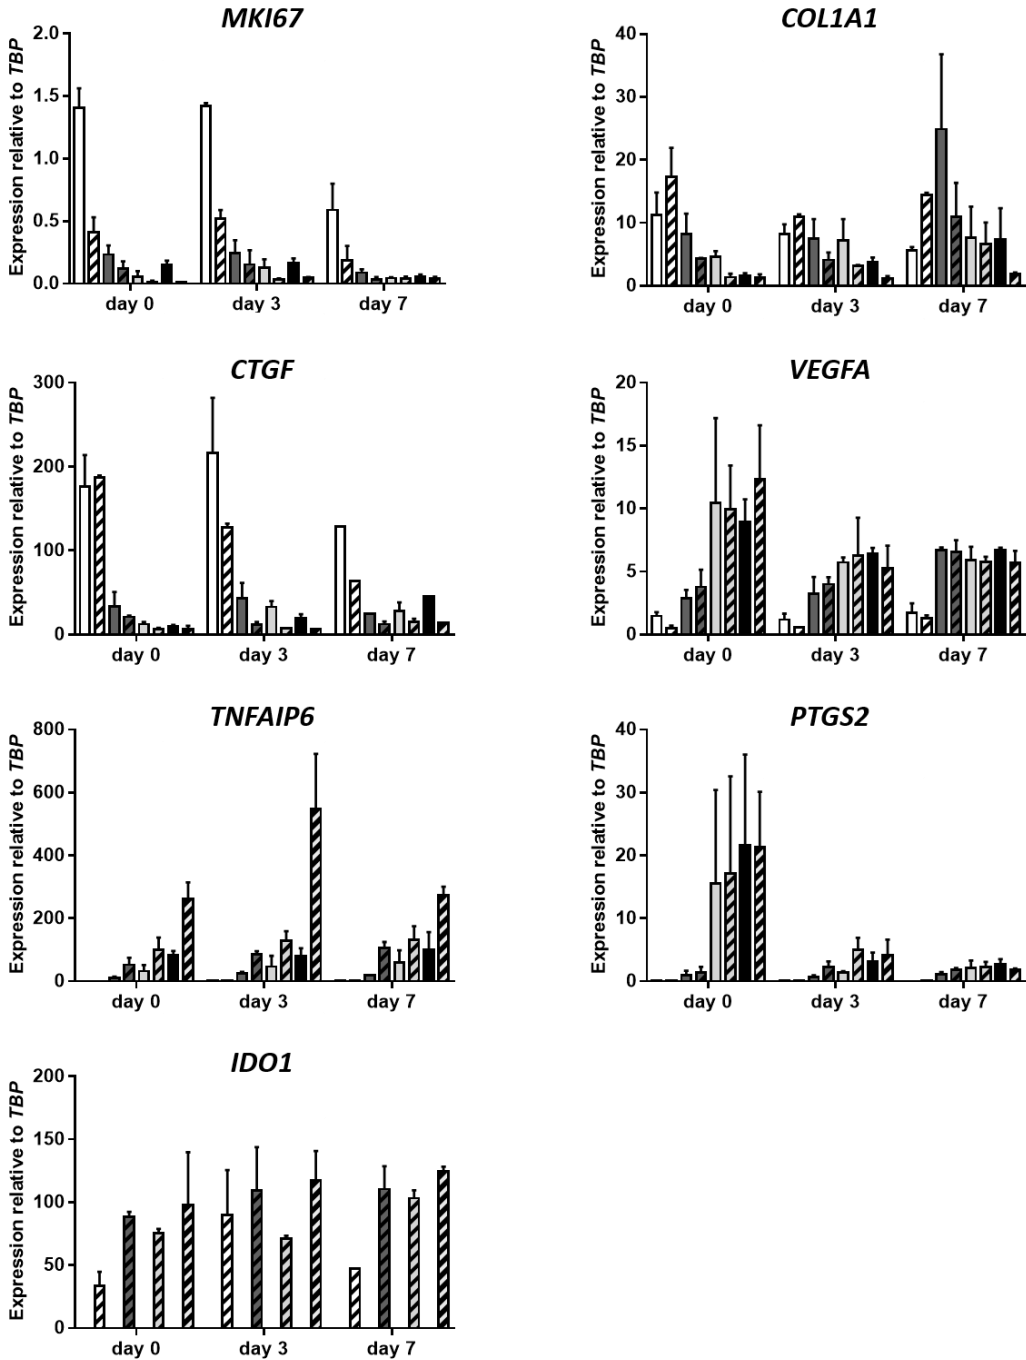

**Supplementary Fig. S3. Relative gene expression over time in resting or IFN- $\gamma$ -stimulated MSCs cultured in 2D vs. 3D.** Time course of expression for proliferation-, ECM-, pro-angiogenic, and immunomodulatory genes in 2D monolayer MSCs vs. SA, HD, and FC MSC aggregates.

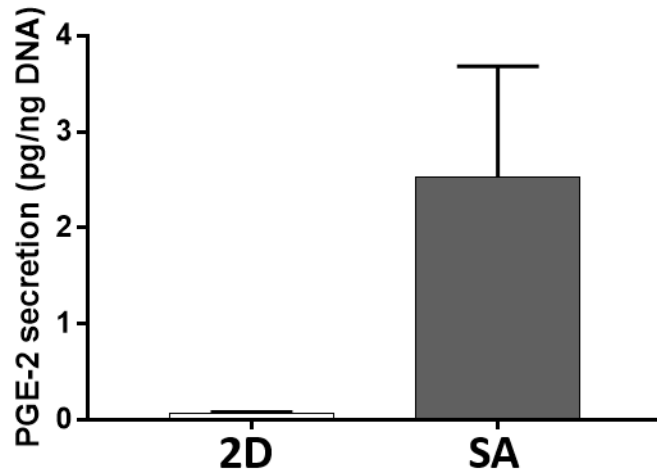

**Supplementary Fig. S4. PGE2 production in 2D vs. 3D MSCs.** MSCs in 3D aggregates (SA) produce >40-fold higher levels of PGE2 compared to 2D monolayer MSCs. PGE2 was measured in conditioned media from IFN- $\gamma$ -stimulated MSCs.

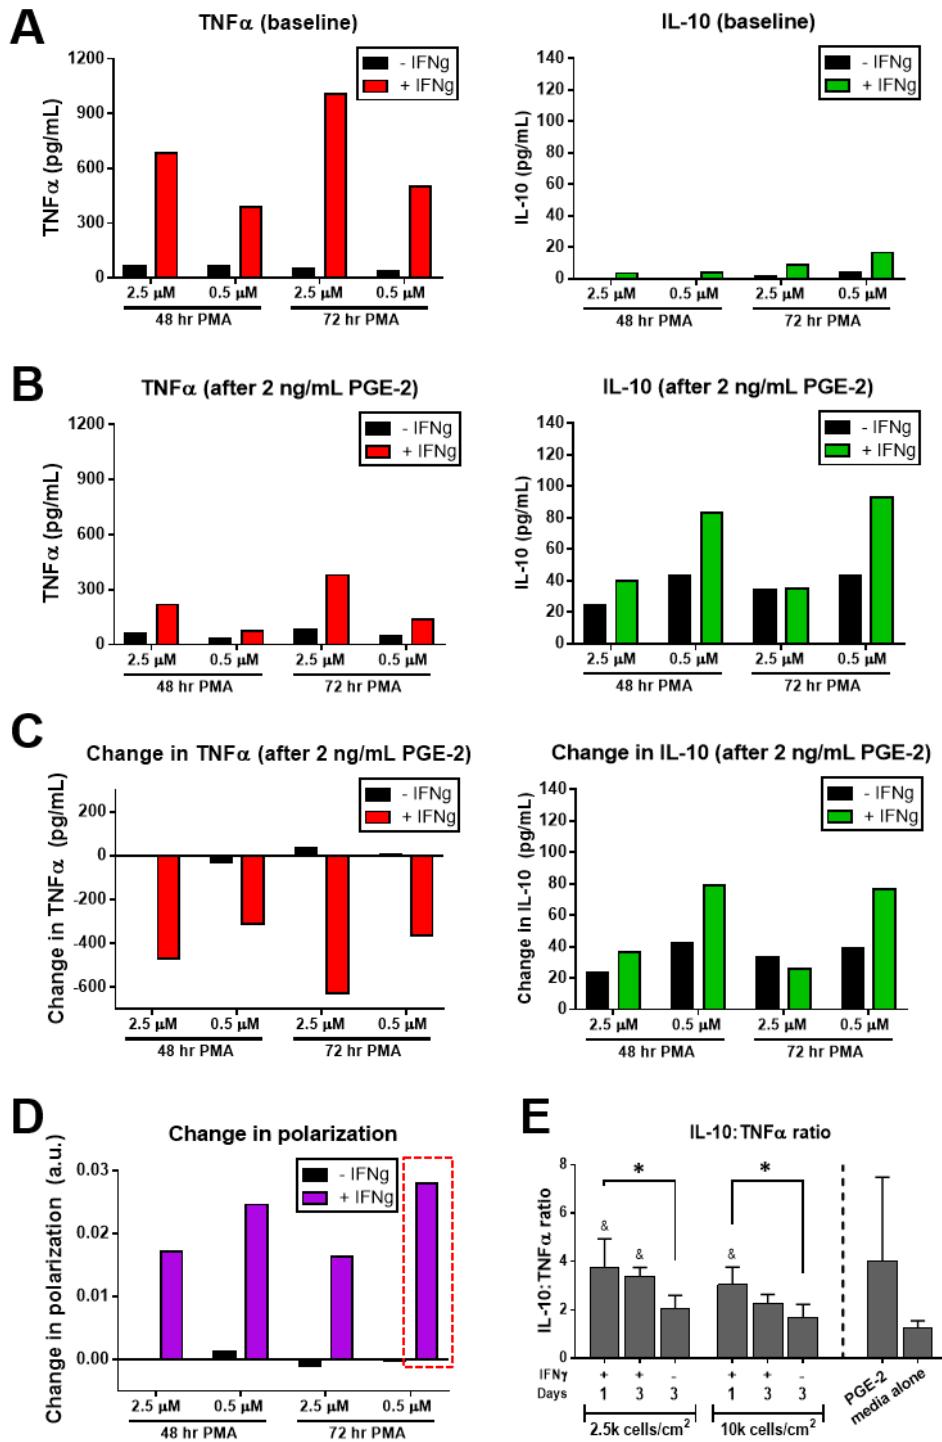

**Supplementary Fig. S5. Development of macrophage polarization assay.** (A) Baseline cytokine profile in M $\phi$ -CM following treatment ( $\pm$  IFNg) of PMA-treated THP-1s. (B) Cytokine profile in M $\phi$ -CM following additional treatment with 2 ng/mL PGE-2. (C) Change in cytokine profile in M $\phi$ -CM between baseline and PGE-2-treated M $\phi$ . (D) “Change in M $\phi$  polarization”, defined as a composite metric taking into account the differences in both TNF $\alpha$  and IL-10 production after PGE-2 treatment of M $\phi$ . Absolute changes in pg/mL secretion of each cytokine were weighted equally; decreases in TNF $\alpha$  production and increases in IL-10 production



contributed positively to “change in polarization” metric. Red box denotes the treatment condition that was used for macrophage polarization assays. (E) Determination of cell number per media volume and duration (days) of MSC media conditioning for macrophage polarization assays. MSC media conditioning was performed with 2D MSCs in 12-well plate format ( $2.5\text{k}/\text{cm}^2 = 4,500 \text{ cells/mL}$ ;  $10\text{k}/\text{cm}^2 = 18,000 \text{ cells/mL}$ ). Graph shows IL-10:TNF $\alpha$  ratio in M $\phi$ -CM following treatment of macrophages with PGE-2 or media conditioned by IFN $\gamma$ -stimulated or resting MSCs for 1 or 3 days. \* indicates significant difference between denoted conditions. & denotes significant difference relative to negative control (“media alone”).  $p < 0.05$

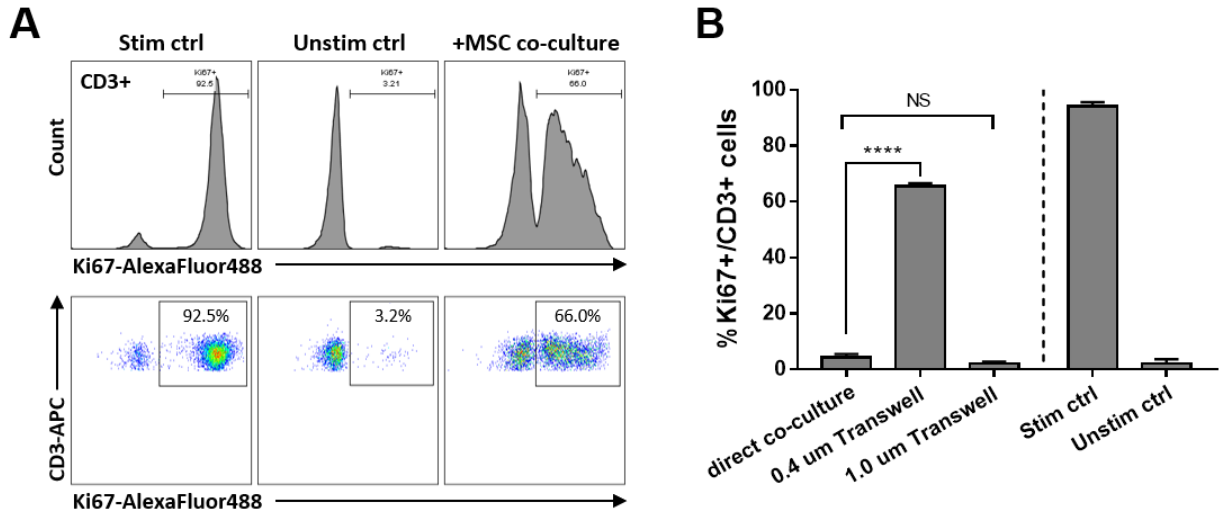

**Supplementary Fig. S6. Refinement of T cell suppression assay.** (A) Histogram representation of MSC-mediated suppression of T cell proliferation. (B) Effect of Transwell pore size on MSC suppression of T cell proliferation. 0.4  $\mu\text{m}$  Transwell significantly reduces the capacity of 2D monolayer MSCs to suppress T cell proliferation, while 1.0  $\mu\text{m}$  pore Transwell rescues the full suppressive effect of MSCs seen in direct co-culture. “Stim ctrl”: PBMCs activated by Suppression Inspector beads, no MSCs. “Unstim ctrl”: PBMCs without beads, no MSCs.

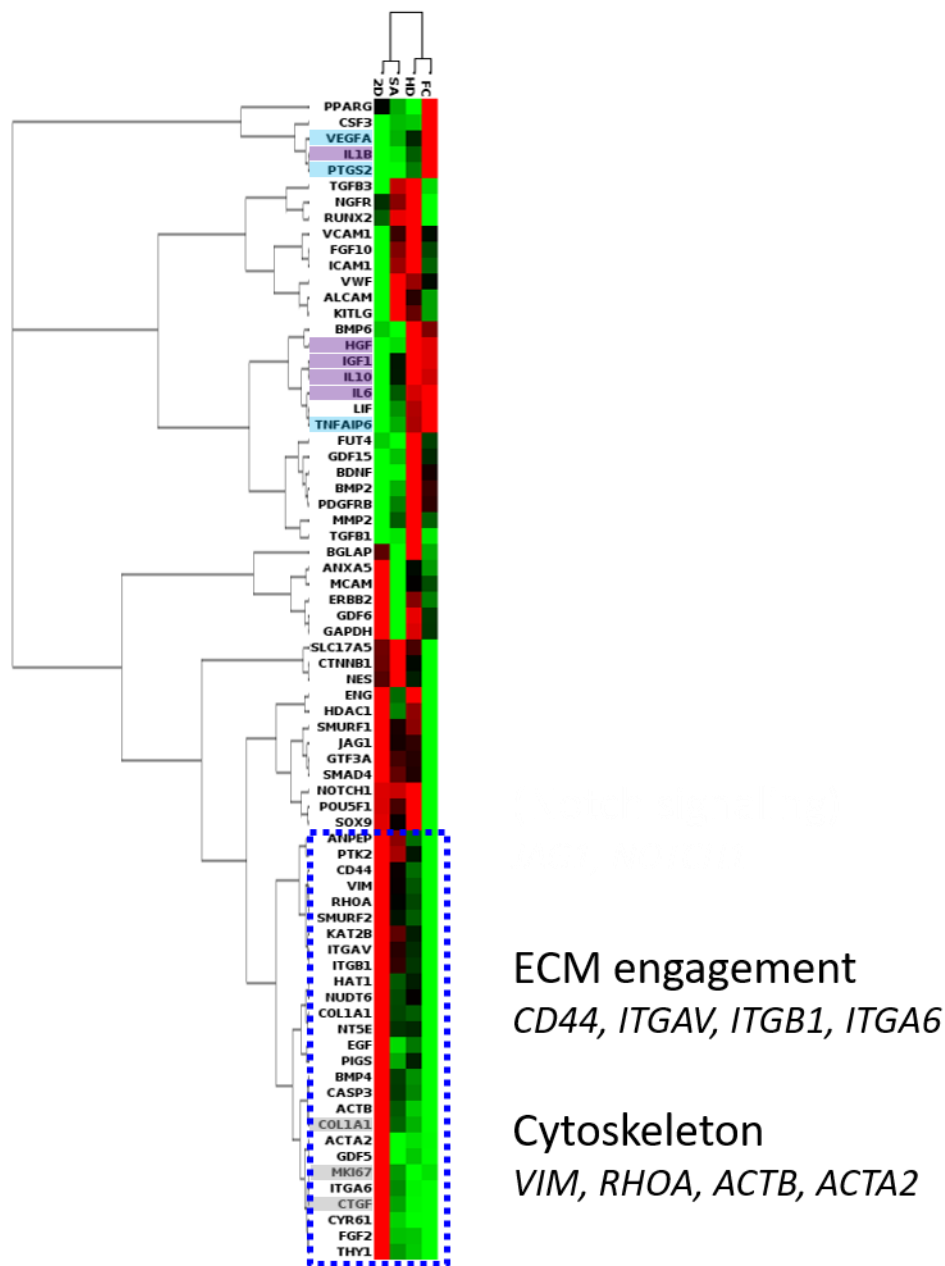

**Supplementary Fig. S7. Unsupervised hierarchical clustering of MSC genes vs. culture format.** Genes related to trophic/immunomodulatory factor production, cell-cell and cell-matrix interactions, cytoskeleton, and stemness/differentiation for 2D monolayer MSCs and 3D MSC aggregates generated by SA, HD, and FC methods were assessed by qPCR array at day 0 (resting conditions). Gene names highlighted in light blue and gray denote those that were assessed in time course studies in Fig. 3. Gene names in purple denote other common cytokines involved in immune regulation.

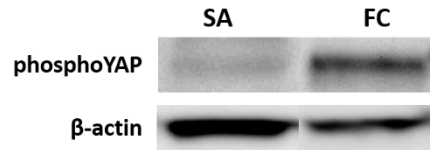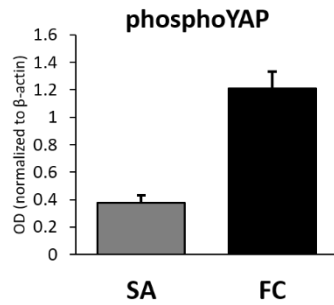

**Supplementary Fig. S8. MSC aggregation method influences YAP phosphorylation.** SA and FC MSC aggregates were formed by SA or FC methods and harvested for Western blot analysis at day 0 (72 hours after initial seeding). Western blots confirmed higher phosphoYAP levels in FC aggregates, indicative of decreasing YAP activity.

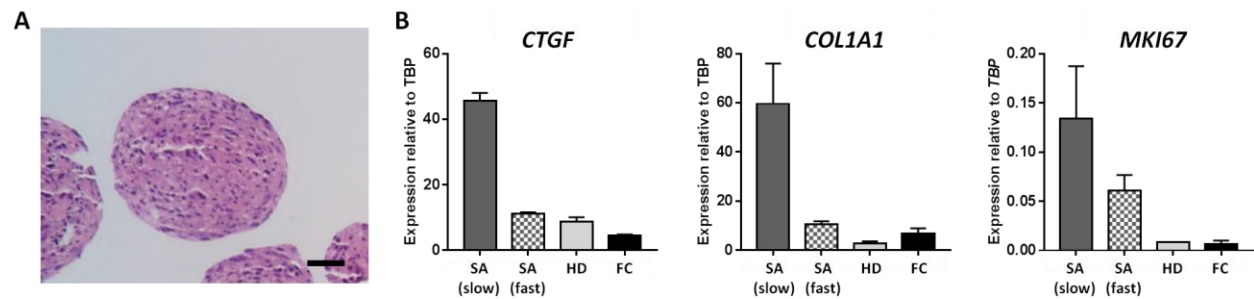

**Supplementary Fig. S9. Faster aggregation kinetics downregulates expression of ECM- and proliferation-associated genes in SA aggregates.** SA aggregates formed via “fast” self-assembly were generated from 0.5% cycRGDfC labile SAMs. (A) Representative H&E stain of day 0 “fast SA” MSC aggregates. Scale bar = 250  $\mu$ m. (B) Expression of ECM- and proliferation-associated genes in day 0 “fast SA” MSC aggregates, compared to other conditions tested in this study. Data shown are from experiments independent from those used to generate the data in Supplementary Fig. S2.

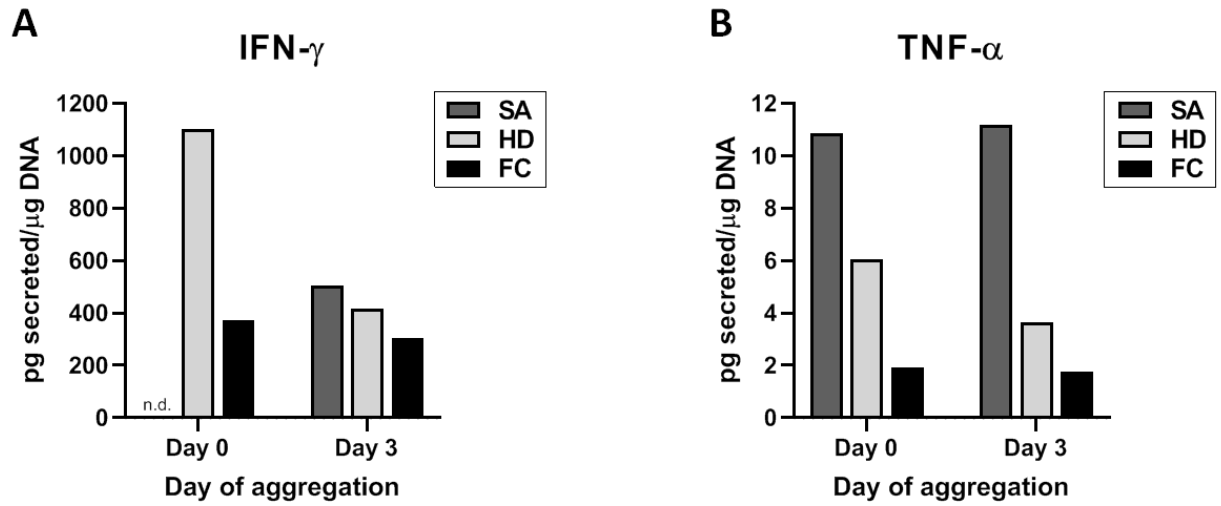

**Supplementary Fig. S10.** MSC aggregation method influences endogenous inflammatory cytokine production. Endogenous production of (A) IFN- $\gamma$  and (B) TNF- $\alpha$  by SA, HD, and FC aggregates at Day 0 and Day 3 were measured from conditioned media (alphaMEM with 0.5% FBS) and normalized to total aggregate DNA. Cytokine production was measured using Inflammatory Cytokine Arrays (Raybiotech), while DNA was measured using Quant-iT PicoGreen dsDNA Assay Kit (Thermo Fisher Scientific). “n.d.” indicates signal was not detectable.

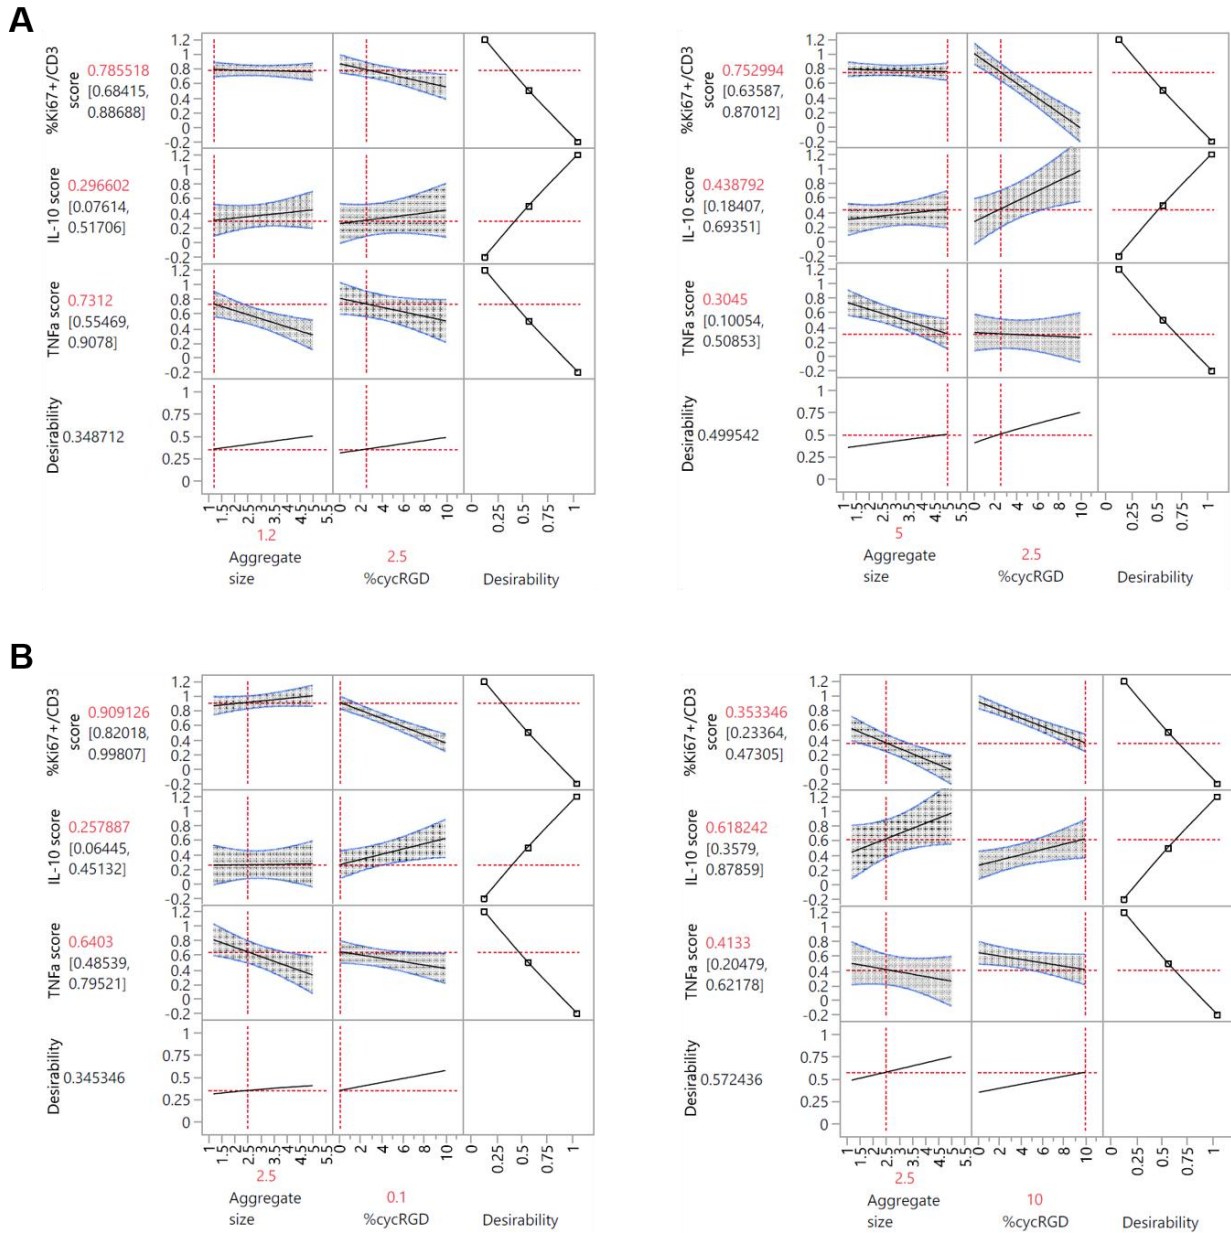

**Supplementary Fig. S11. Extended model predictions from DOE model exemplify the interaction effect between aggregate size and aggregation kinetics.** Prediction profiles showing effects of (A) Changing aggregate size while holding %cycRGD constant and (B) Changing aggregation kinetics (%cycRGD) while holding aggregate size constant. The DOE model identified an interaction effect between aggregate size and kinetics in their influence on %Ki67+/CD3 score.
